# Supplementary material
Source: HighWire-hosted journal article supplement (http://jpet.aspetjournals.org/highwire/filestream/136410/field_highwire_adjunct_files/4/JPET208595_SUPPLEMENTAL_DATA_5.pdf)

**Combined Analysis of Pharmacokinetic and Efficacy Data of Preclinical Studies with Statins Markedly Improves Translation of Drug Efficacy to Human Trials**

*E. van de Steeg, R. Kleemann, H.T. Jansen, W. van Duyvenvoorde, E.H. Offerman, H.M. Wortelboer and J. DeGroot*

**SUPPLEMENTAL DATA 5**

Drug levels of [<sup>3</sup>H]-rosuvastatin, [<sup>3</sup>H]-atorvastatin and [<sup>3</sup>H]-pravastatin in (A) stomach, (B) intestine (tissue plus contents), (C) colon (tissue plus contents) and (D) kidney of E3L mice 30 and 120 minutes after oral dosage (10 mg/kg)

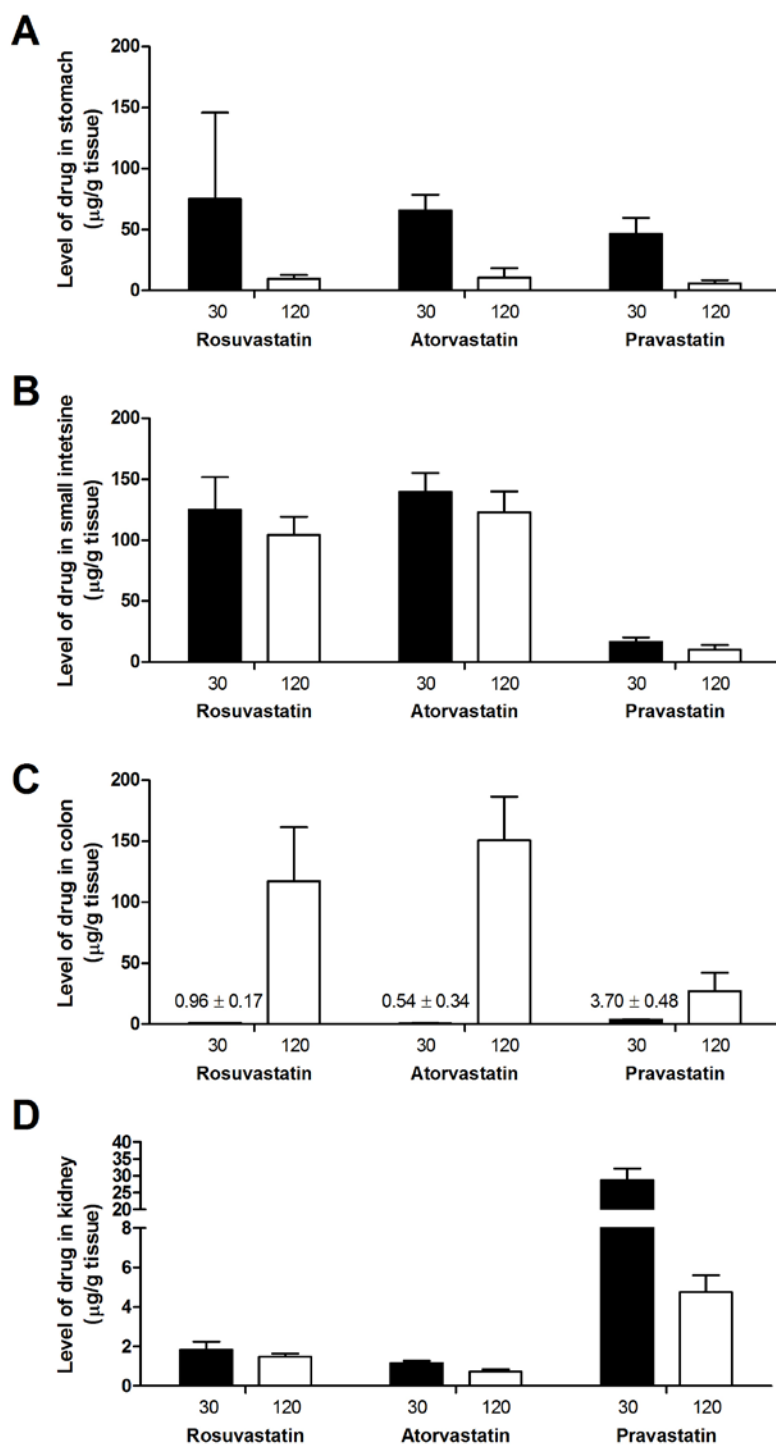

Supplement: JPET208595_SUPPLEMENTAL_DATA_5.pdf [file JPET208595_SUPPLEMENTAL_DATA_5.pdf]
